# Supplementary material for: An Artificial Peptide-Based Bifunctional HIV-1 Entry Inhibitor That Interferes with Viral Glycoprotein-41 Six-Helix Bundle Formation and Antagonizes CCR5 on the Host Cell Membrane
Source: MDPI journal article supplement (doi:10.3390/v15051038), 2023-04-23

## Supporting Information

### **An Artificial Peptide-based Bifunctional HIV-1 Entry Inhibitor That Interferes with Viral Glycoprotein-41 Six-Helix Bundle Formation and Antagonizes CCR5 on the Host Cell Membrane**

Chao Wang,<sup>\*,†,¶</sup> Qing Li,<sup>†,¶</sup> Lujia Sun,<sup>†,¶</sup> Xinling Wang,<sup>‡</sup> Huan Wang,<sup>†</sup> Wenpeng Zhang,<sup>†</sup> Jiahui Li,<sup>†,#</sup> Yang Liu,<sup>\*,#</sup> Lu Lu,<sup>\*,‡</sup> and Shibo Jiang<sup>\*,‡</sup>

<sup>†</sup> State Key Laboratory of Toxicology and Medical Countermeasures, Beijing Institute of Pharmacology and Toxicology, 27 Tai-Ping Road, Beijing 100850, China;

<sup>‡</sup> Key Laboratory of Medical Molecular Virology (MOE/NHC/CAMS), School of Basic Medical Sciences & Shanghai Public Health Clinical Center, Shanghai Institute of Infectious Diseases and Biosecurity, Fudan University, 131 Dong An Road, Shanghai 200032, China;

<sup>#</sup> Key Laboratory of Structure-based Drug Design & Discovery of Ministry of Education, School of Pharmaceutical Engineering, Shenyang Pharmaceutical University, Shenyang 110016, China.

<sup>¶</sup> These authors contributed equally to this work.

#### Corresponding Authors:

S.J.: Key Laboratory of Medical Molecular Virology of (MOE/NHC/CAMS), School of Basic Medical Sciences & Shanghai Public Health Clinical Center, Fudan University, 131 Dong An Road, Shanghai 200032, China; Tel.: 86-21-5423-7673; Fax: 86-21-5423-7465; E-mail: shibojiang@fudan.edu.cn.

C.W.: State Key Laboratory of Toxicology and Medical Countermeasures, Beijing Institute of Pharmacology & Toxicology, 27 Tai-Ping Road, Beijing 100850, China; Tel.: 86-10-6693-0640; Fax: 86-10-6821-1656, E-mail: chaow301@sina.com.

L.L.: Key Laboratory of Medical Molecular Virology of (MOE/NHC/CAMS), School of Basic Medical Sciences & Shanghai Public Health Clinical Center, Fudan University, 131 Dong An Road, Shanghai 200032, China; Tel.: 86-21-5423-7671; Fax: 86-21-5423-7465; E-mail: lul@fudan.edu.cn

Y.L.: Key Laboratory of Structure-based Drug Design & Discovery of the Ministry of Education, Shenyang Pharmaceutical University, Shenyang 110016, China; Tel.: 86-24-4352-0227; E-mail: y.liu@syphu.edu.cn

## Table of Contents

### *Supplemental Tables and Figures*

|                                                                                                        |           |
|--------------------------------------------------------------------------------------------------------|-----------|
| Table S1 HPLC method used for the purification of peptide compounds.....                               | S2        |
| Table S2 HPLC method used for the analysis of peptide compounds.....                                   | S2        |
| Figure S1 Schematic representation of the strategy used for preparation of bifunctional molecules..... | S3        |
| Figure S2 The potential cytotoxicity of peptide AP3P4E.....                                            | S3        |
| <i>MALDI-TOF-MS and Analytical HPLC of designed peptides.....</i>                                      | <i>S4</i> |

**Table S1.** HPLC method used for the purification of peptide compounds<sup>a</sup>

| Time (min) | Solvent A (%) | Solvent B (%) |
|------------|---------------|---------------|
| 5          | 70            | 30            |
| 13         | 53            | 47            |
| 30         | 17            | 83            |
| 35         | 17            | 83            |
| 55         | 70            | 30            |
| 60         | 70            | 30            |

<sup>a</sup> The crude peptide products were purified by preparative reverse phase HPLC with a Waters preparative HPLC system (PrepLC 4000) on a Waters X-bridge C8 column (19.5mm × 250mm, 10μm) at constant flow rate of 16 mL/min. Solvent A: 0.1% trifluoroacetic acid in H<sub>2</sub>O; Solvent B: 0.1% trifluoroacetic acid in 70% CH<sub>3</sub>CN/H<sub>2</sub>O.

**Table S2.** HPLC method used for the analysis of peptide compounds<sup>a</sup>

| Methods  | Time (min) | Solvent A (%) | Solvent B (%) |
|----------|------------|---------------|---------------|
| Method A | 5          | 50            | 50            |
|          | 10         | 0             | 100           |
|          | 15         | 0             | 100           |
|          | 20         | 0             | 100           |
|          | 23         | 0             | 100           |
|          | 25         | 90            | 10            |
| Method B | 5          | 50            | 50            |
|          | 10         | 30            | 70            |
|          | 15         | 10            | 90            |
|          | 20         | 0             | 100           |
|          | 23         | 0             | 100           |
|          | 25         | 90            | 10            |

<sup>a</sup> The peptide compounds were analyzed by analytical RP-HPLC was performed on a RP-C8 column (Zorbax Eclipse XDB-C8, 4.6 × 150 mm, 5 μm) using two different solvent systems (Methods A and B), and a flow rate of 1 mL/min with detection at 210 nm. Solvent A: 0.1% trifluoroacetic acid in H<sub>2</sub>O; Solvent B: 0.1% trifluoroacetic acid in 70% CH<sub>3</sub>CN/H<sub>2</sub>O.

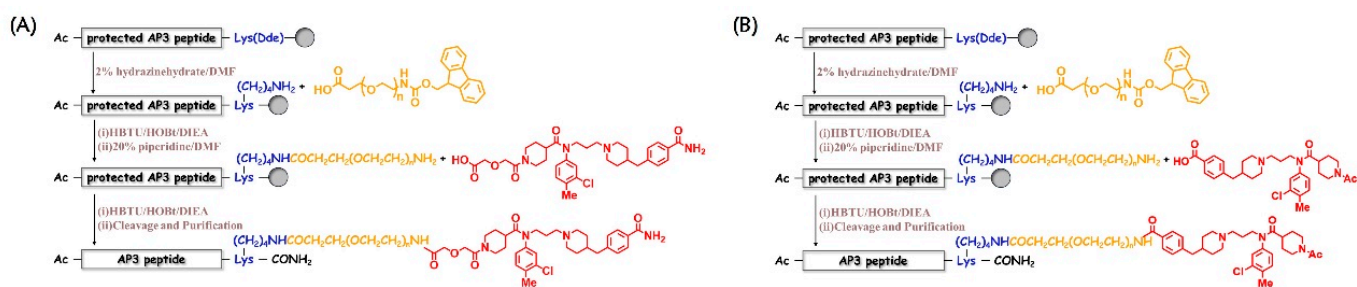

**Figure S1.** Schematic representation of the strategy used for preparation of bifunctional molecules

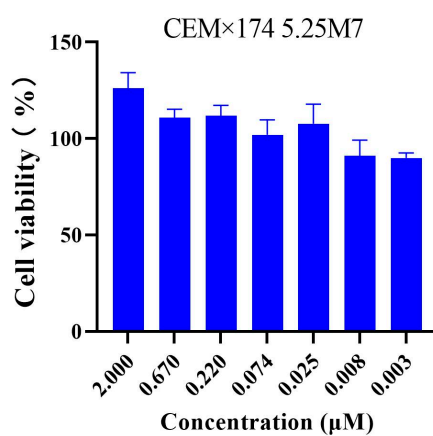

**Figure S2.** The potential cytotoxicity of AP3P4E on the CEMx174 5.25M7 cells.

## MALDI-TOF-MS and analytical HPLC of designed peptides

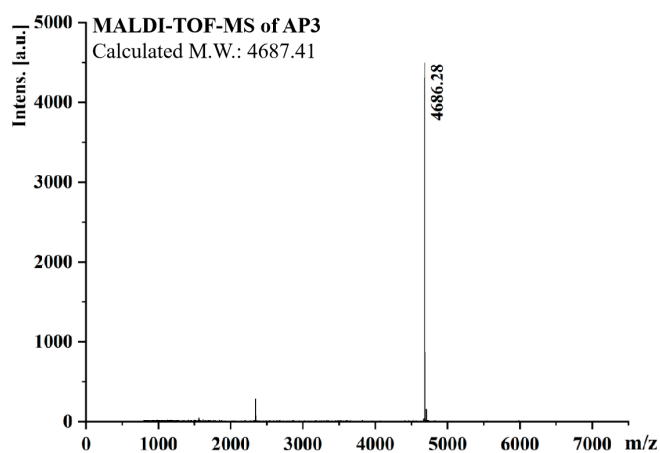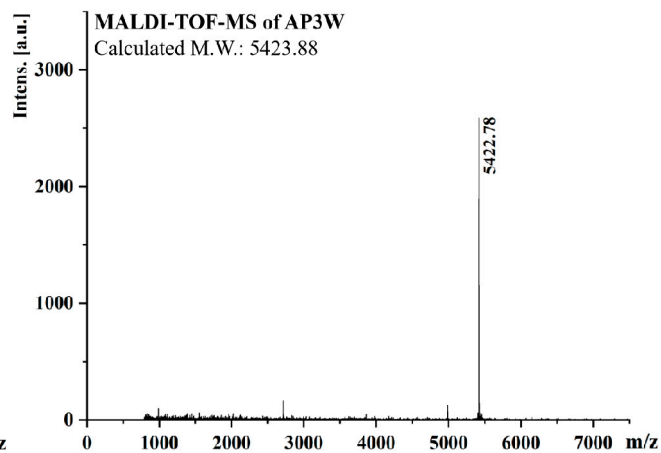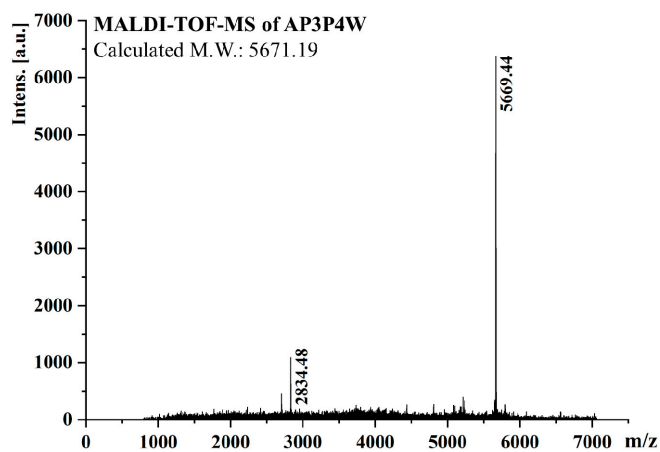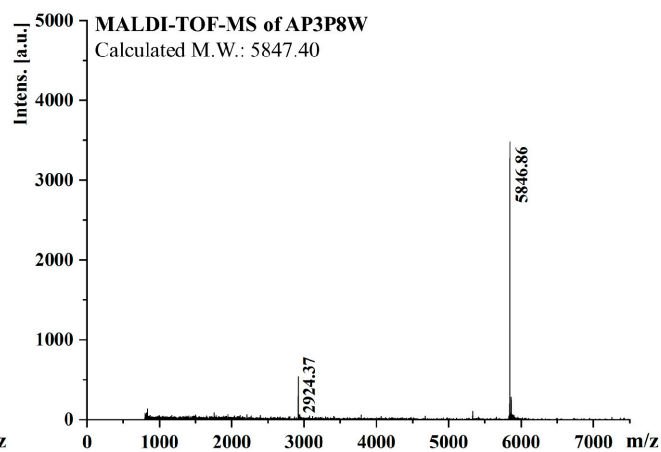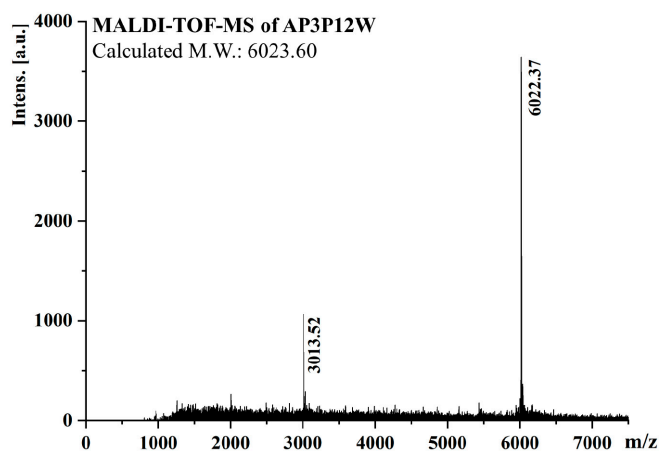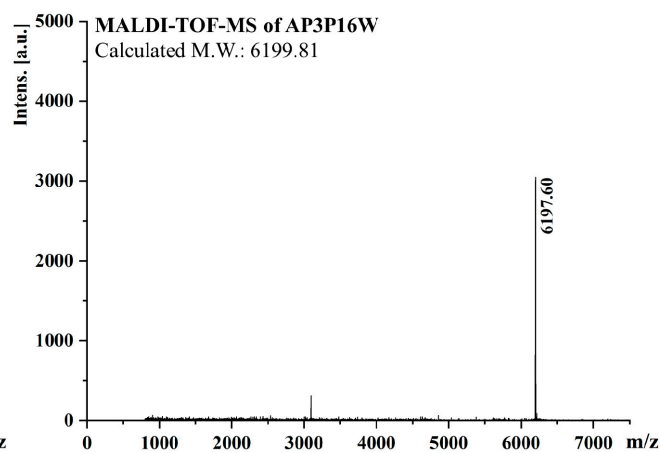

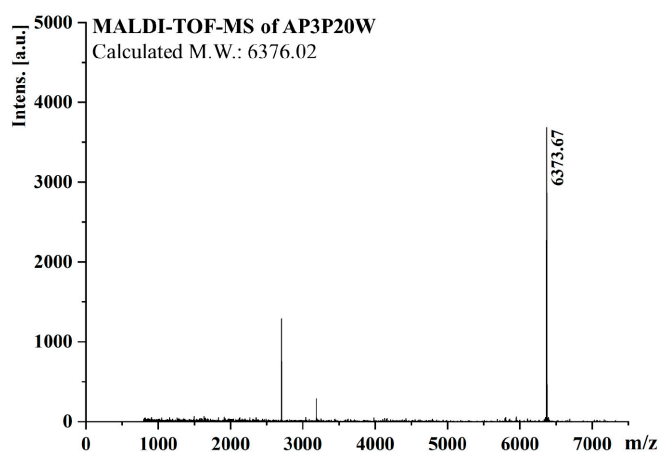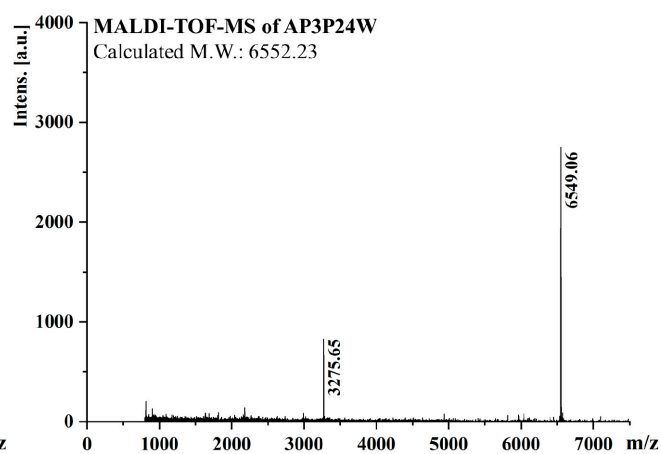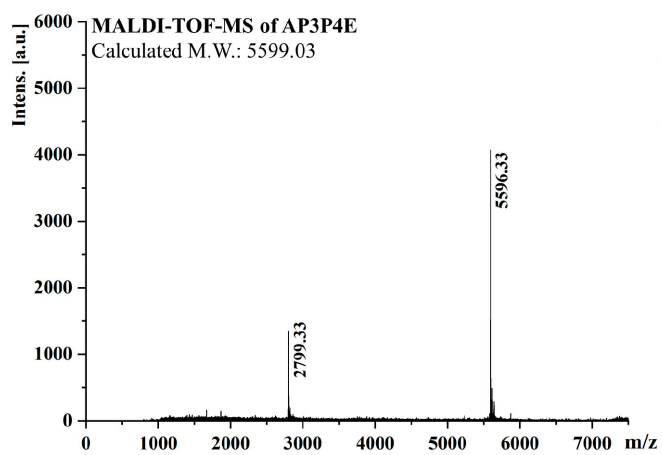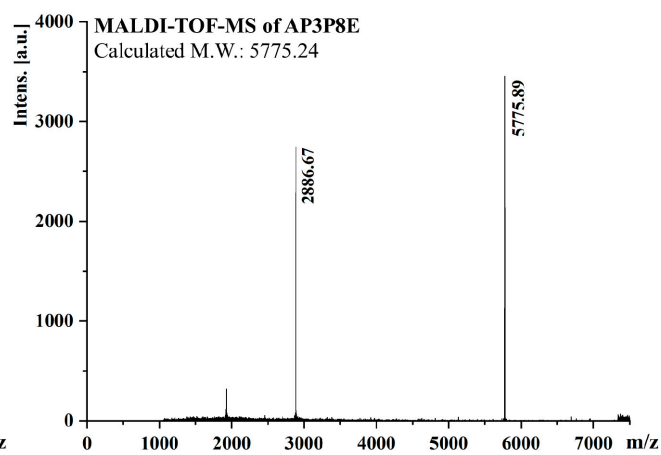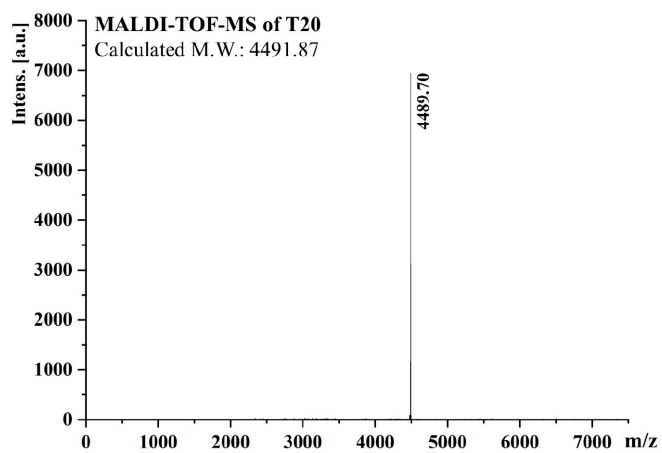

**Analytical HPLC of AP3**  
[97% purity,  $t_R$  (Method A)= 12.4 min]

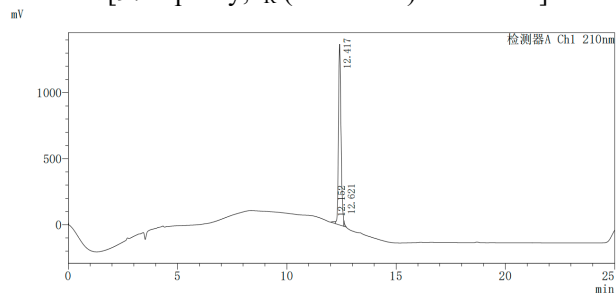

**Analytical HPLC of AP3**  
[96% purity,  $t_R$  (Method B)= 14.9 min]

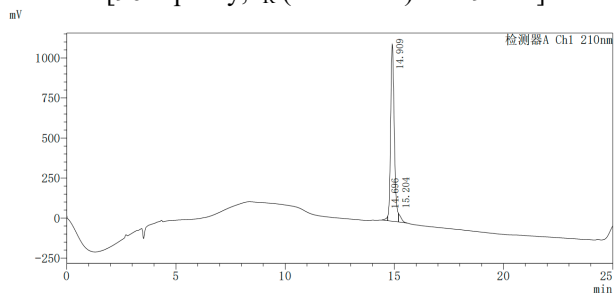

**Analytical HPLC of AP3W**  
[99% purity,  $t_R$  (Method A)= 12.4 min]

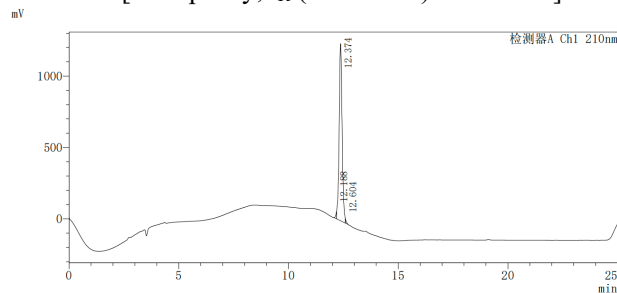

**Analytical HPLC of AP3W**  
[96% purity,  $t_R$  (Method B)= 15.3 min]

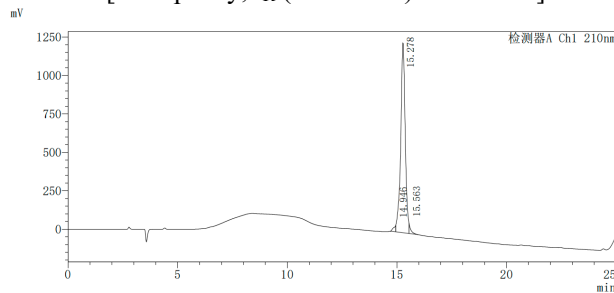

**Analytical HPLC of AP3P4W**  
[99% purity,  $t_R$  (Method A)= 12.5 min]

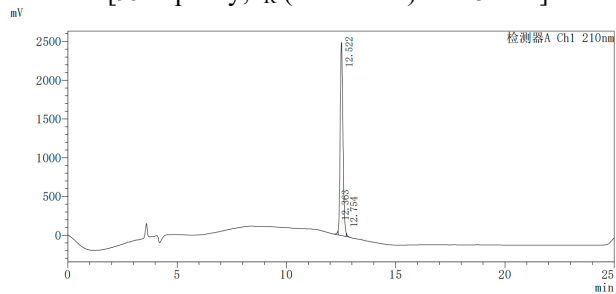

**Analytical HPLC of AP3P4W**  
[99% purity,  $t_R$  (Method B)= 15.2 min]

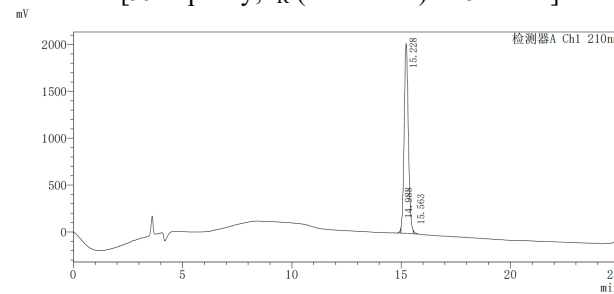

**Analytical HPLC of AP3P8W**  
[99% purity,  $t_R$  (Method A)= 12.3 min]

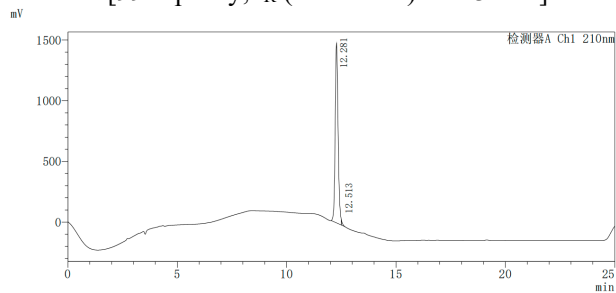

**Analytical HPLC of AP3P8W**  
[98% purity,  $t_R$  (Method B)= 15.2 min]

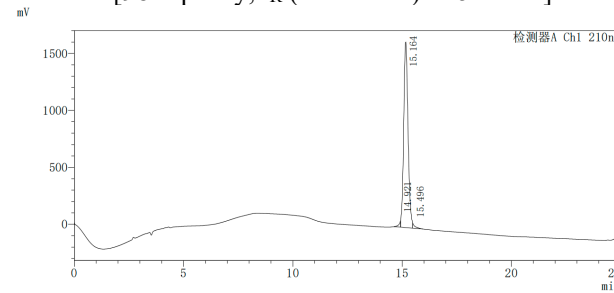

**Analytical HPLC of AP3P12W**  
[99% purity,  $t_R$  (Method A)= 12.5 min]

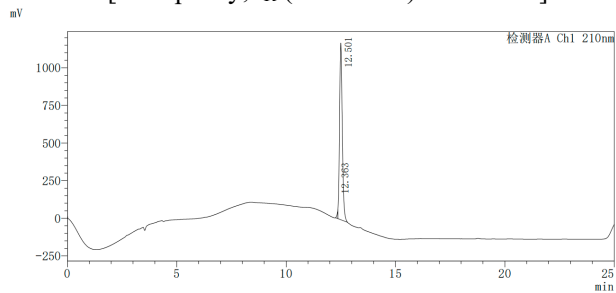

**Analytical HPLC of AP3P12W**  
[98% purity,  $t_R$  (Method B)= 14.7 min]

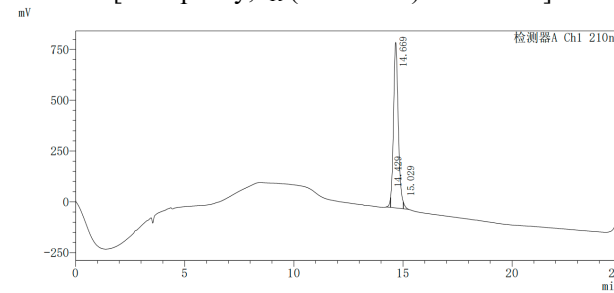

**Analytical HPLC of AP3P16W**  
[99% purity,  $t_R$  (Method A)= 12.5 min]

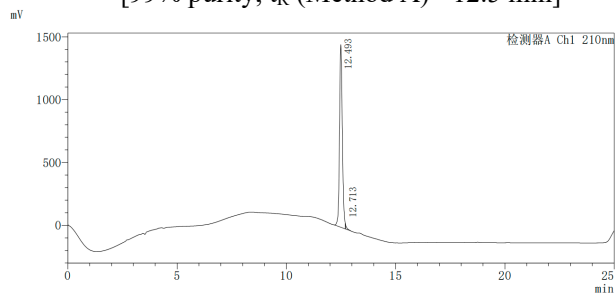

**Analytical HPLC of AP3P16W**  
[98% purity,  $t_R$  (Method B)= 15.2 min]

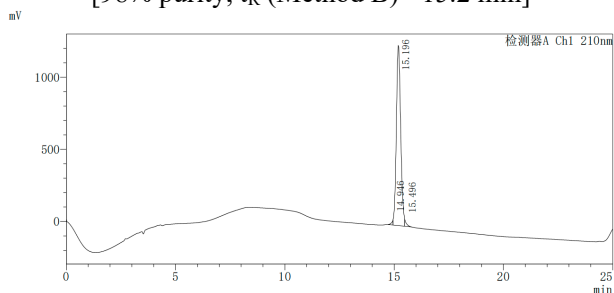

**Analytical HPLC of AP3P20W**  
[99% purity,  $t_R$  (Method A)= 12.5 min]

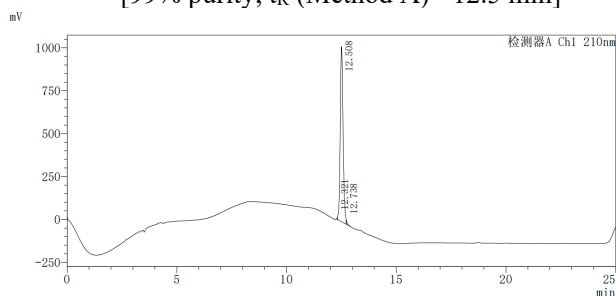

**Analytical HPLC of AP3P20W**  
[99% purity,  $t_R$  (Method B)= 15.2 min]

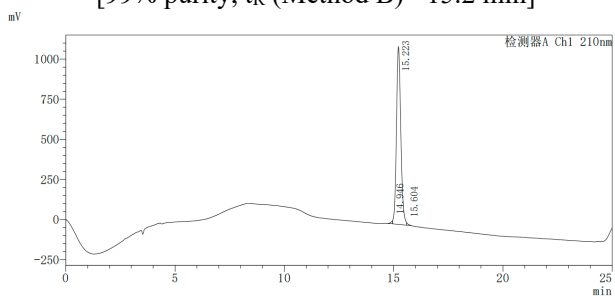

**Analytical HPLC of AP3P24W**  
[99% purity,  $t_R$  (Method A)= 12.5 min]

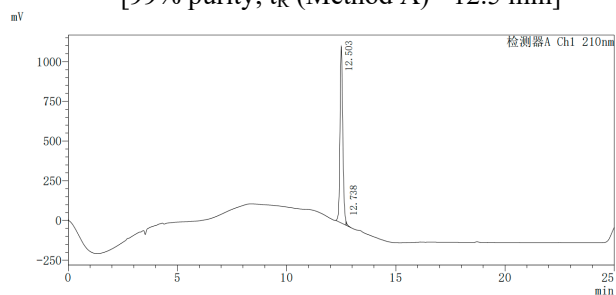

**Analytical HPLC of AP3P24W**  
[98% purity,  $t_R$  (Method B)= 15.2 min]

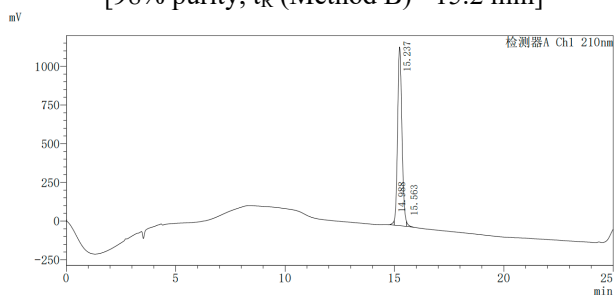

**Analytical HPLC of AP3P4E**  
[99% purity,  $t_R$  (Method A)= 12.6 min]

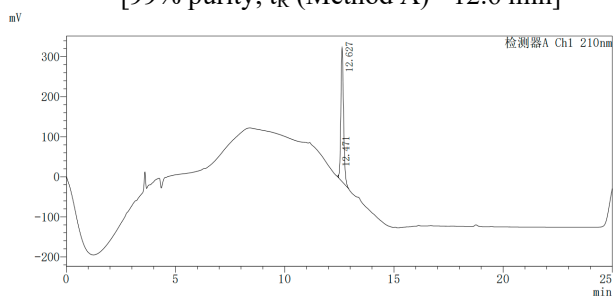

**Analytical HPLC of AP3P4E**  
[97% purity,  $t_R$  (Method B)= 15.5 min]

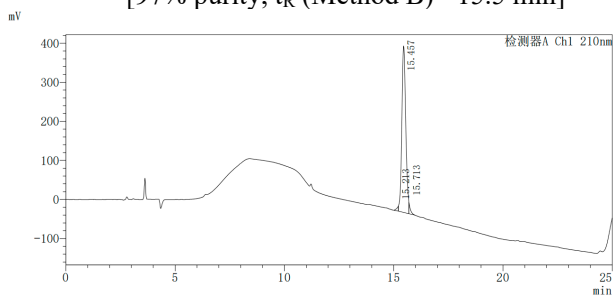

**Analytical HPLC of AP3P8E**  
[99% purity,  $t_R$  (Method A)= 12.5 min]

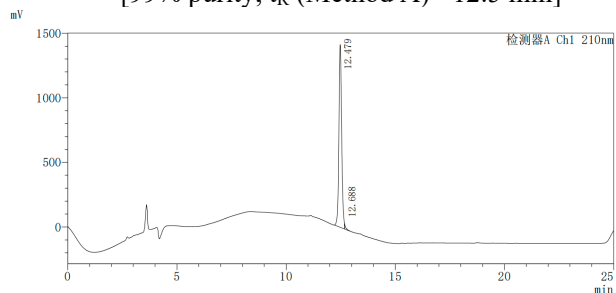

**Analytical HPLC of AP3P8E**  
[98% purity,  $t_R$  (Method B)= 15.2 min]

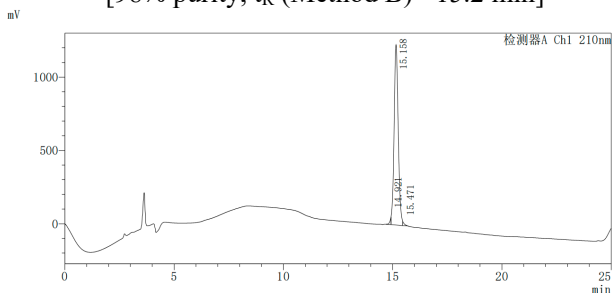

**Analytical HPLC of T20**  
[98% purity,  $t_R$  (Method A)= 12.5 min]

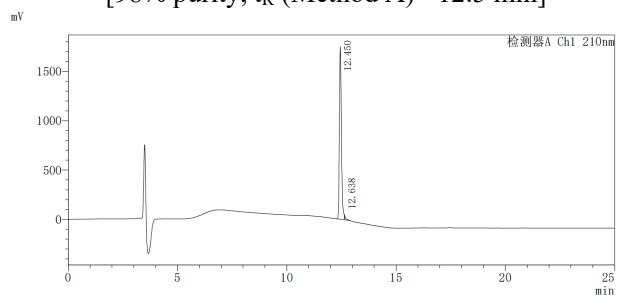

**Analytical HPLC of T20**  
[96% purity,  $t_R$  (Method B)= 16.8 min]

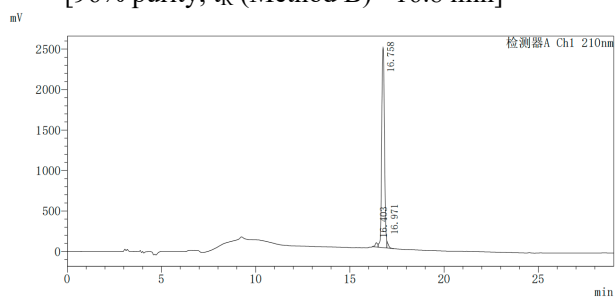

Supplement: s1 [file s1]
